# Supplementary material for: Sacrificial agent-free photocatalytic H2O2evolutionviatwo-electron oxygen reduction using a ternary α-Fe2O3/CQD@g-C3N4photocatalyst with broad-spectrum response
Source: Royal Society of Chemistry journal article supplement (doi:10.1039/d0ta05753c), 2020-01-01
Supplement: d0ta05753c1.pdf [file d0ta05753c1.pdf]

## Electronic supplementary information:

### **Sacrificial agent-free photocatalytic H<sub>2</sub>O<sub>2</sub> evolution via two-electron oxygen reduction using a ternary $\alpha$ -Fe<sub>2</sub>O<sub>3</sub>/CQD@g-C<sub>3</sub>N<sub>4</sub> photocatalyst with broad-spectrum response**

Xi Chen <sup>a, b</sup>, Wenwen Zhang <sup>b</sup>, Lixiang Zhang <sup>c, b</sup>, Luping Feng <sup>a, b</sup>, Chunxian Zhang <sup>b</sup>, Jie Jiang <sup>d</sup>,  
Tingjiang Yan <sup>b</sup>, Hua Wang <sup>a, b, d\*</sup>

<sup>a</sup> School of Chemistry and Chemical Engineering, Harbin Institute of Technology, Harbin, Heilongjiang 150090, P. R. China.

<sup>b</sup> Institute of Medicine and Materials Applied Technologies, College of Chemistry and Chemical Engineering, Qufu Normal University, Qufu, Shandong 273165, P. R. China.

<sup>c</sup> School of Environment, Harbin Institute of Technology, Harbin, Heilongjiang 150090, P. R. China.

<sup>d</sup> School of Marine Science and Technology, Harbin Institute of Technology at Weihai, Weihai, Shandong 264209, P. R. China.

\*Corresponding Author: E-mail addresses: huawang@qfnu.edu.cn; Tel: +86 537 4456306; Web: <http://wang.qfnu.edu.cn>.

## Experimental Section

**Synthesis of carbon quantum dots (CQDs).** The CQDs were prepared from the decomposition of isopropanol via a solvothermal method. Typically, 16.4 mL IPA was added into 13.6 mL DMF. The mixture was then autoclaved in a 70 mL Teflon container at 180°C for 8 h. After cooling to room temperature, the CQDs solution was obtained in the end.

**Synthesis of  $\alpha$ -Fe<sub>2</sub>O<sub>3</sub>@g-C<sub>3</sub>N<sub>4</sub>.** Typically, an aliquot of 0.10 g of ultrathin g-C<sub>3</sub>N<sub>4</sub> and 13.6 mL of  $\alpha$ -Fe<sub>2</sub>O<sub>3</sub> precursor solution above was introduced into 16.4 mL DMF under vigorous stirring. After the ultrasonic dispersion for 30 min, the mixture was transferred into a 70 mL Teflon-lined autoclave, and heated at 180°C for 8 h. Afterwards, the  $\alpha$ -Fe<sub>2</sub>O<sub>3</sub>@g-C<sub>3</sub>N<sub>4</sub> was collected by centrifugation and washed for three times with ethanol, followed by being dried at 60°C overnight.

## Characterization of Photocatalytic Materials

X-ray diffraction (XRD) measurements were performed using a powder diffractometer (Rigaku/MiniFlex600) in the  $2\theta$  range of 10° - 80° with a Cu K $\alpha$  radiation. X-ray photoelectron spectra (XPS) were recorded by a spectrometer (ESCALAB 250Xi) using Al K $\alpha$  radiation with the C 1s peak (284.6 eV) as reference. The microstructures of the samples were explored by the transmission electron microscopy (TEM, JEOL/JEM-2100PLUS) with electron energy of 15 kV. The UV-vis diffuse reflection spectra (DRS) of samples were measured with the spectrophotometer (Shimadzu/UV-3600) using BaSO<sub>4</sub> as reference in the range of 360 - 800 nm. Electron spin resonance (ESR) tests of samples were conducted using a spectrometer (JEOL/JES-FA200) to prove the presence of  $\cdot\text{O}_2^-$  in the photocatalysis reactions.

## Electrochemical Tests

Rotating ring-disk electrode (RRDE) and rotating disk electrode (RDE) measurements were accomplished through an electrochemical workstation (Chenhua CHI 760E) with a four-electrode system (Pine/AFMSRCE). The working electrode was prepared as follows: 5 mg of the product was dispersed into 1 mL of mixed solution containing 475  $\mu\text{L}$  ethanol, 475  $\mu\text{L}$  water, and 50  $\mu\text{L}$  Nafion. Subsequently, 10  $\mu\text{L}$  of this suspension was dropped on a glassy carbon electrode, followed by air drying at 80 °C. The ring-disk electrode was included a glassy carbon disk

(0.2475 cm<sup>2</sup>) and a Pt ring (0.1866 cm<sup>2</sup>). The Pt ring potential was sustained at 1.48 V (vs. RHE). The Ag/AgCl electrode and Pt wire electrode were respectively employed as the reference electrode and counter electrode. The linear sweep voltammetry (LSV) curves were acquired in an O<sub>2</sub>-saturated 0.10 M PBS solution after N<sub>2</sub> and O<sub>2</sub> bubbling for 30 min (pH 7.0). Besides, the electrochemical workstation was also conducted for the Mott-Schottky curves, electrochemical impedance spectroscopy, and transient photocurrent responses of different samples using conventional three-electrode system. Herein, the working electrode was fabricated by dip-coating a 5.0 μL of sample slurry (5 mg/mL aqueous Nafion) on glassy carbon electrode (3 mm<sup>2</sup>) and dried at room temperature.

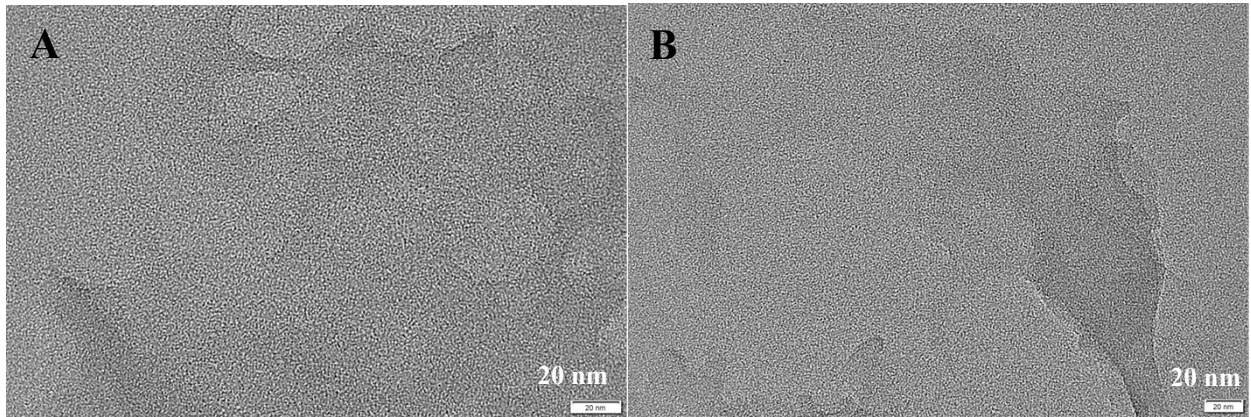

**Fig. S1.** HRTEM images of (A) ultrathin  $g\text{-C}_3\text{N}_4$  with (B) different amplified parts.

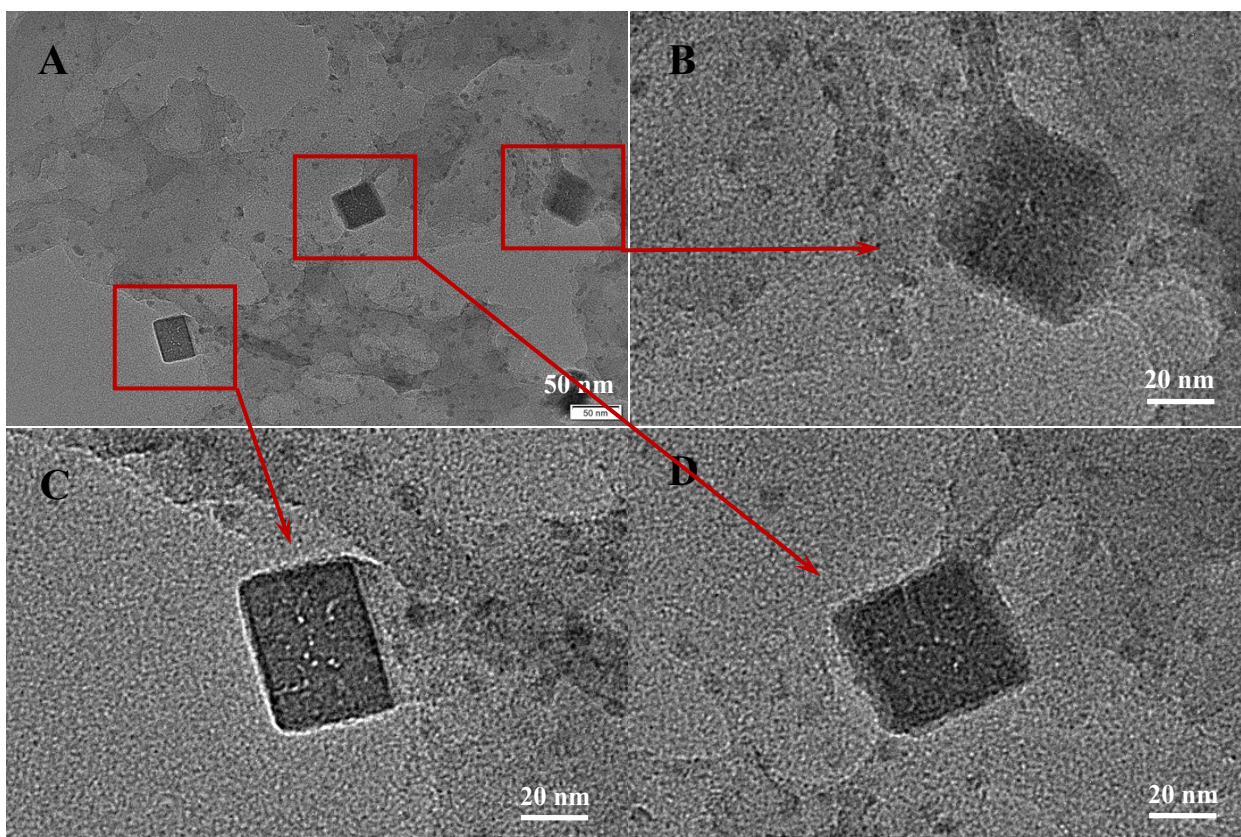

**Fig. S2.** TEM images of  $\alpha\text{-Fe}_2\text{O}_3/\text{CQD}@g\text{-C}_3\text{N}_4$  of (A) full, with (B-D) different magnification-amplified parts.

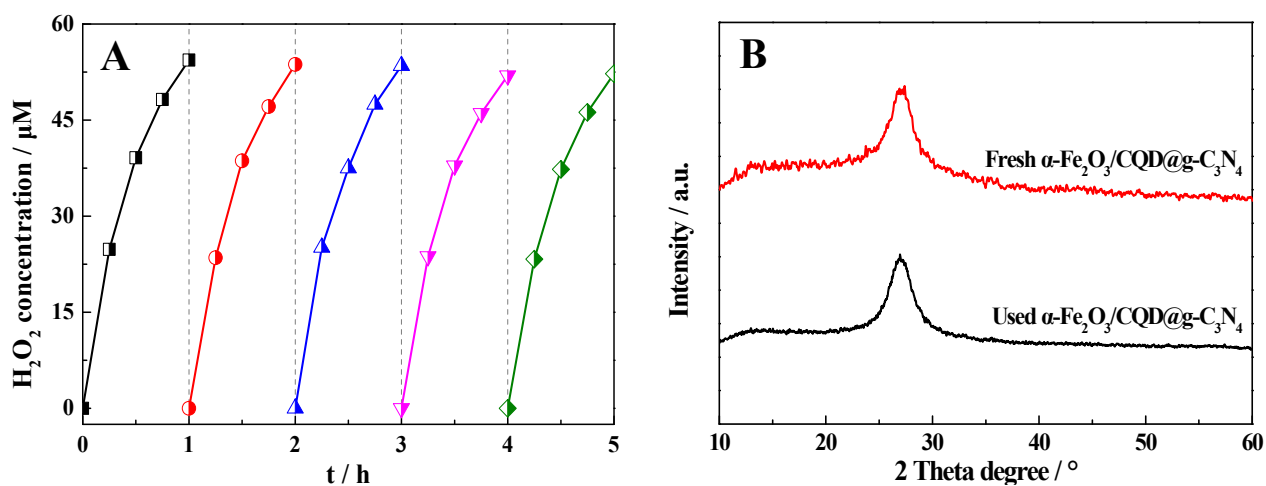

**Fig. S3.** (A) The stability test results of  $\alpha\text{-Fe}_2\text{O}_3/\text{CQD}@g\text{-C}_3\text{N}_4$  for five runs in  $\text{O}_2$ -equilibrated water; (B) XRD patterns of  $\alpha\text{-Fe}_2\text{O}_3/\text{CQD}@g\text{-C}_3\text{N}_4$  before and after five runs.

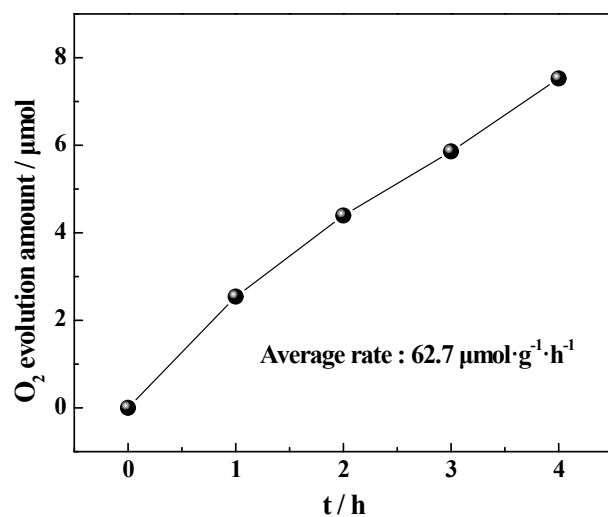

**Fig. S4.** The results of  $\alpha$ -Fe<sub>2</sub>O<sub>3</sub>/CQD@g-C<sub>3</sub>N<sub>4</sub>-photocatalyzed O<sub>2</sub> evolution under visible light irradiation using 1.0 mM of AgNO<sub>3</sub> as the photoelectron quencher. The experiments were carried out in a Labsolar-6A photocatalytic system under vacuum condition with the reaction solutions (pH 7.0) containing 30 mL H<sub>2</sub>O and 30 mg photocatalyst.

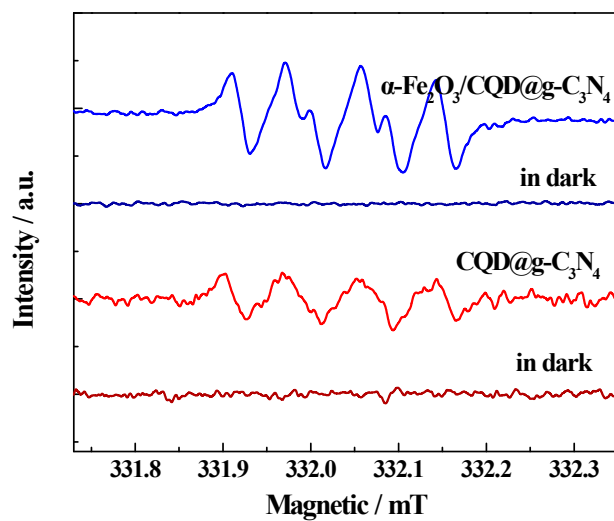

**Fig. S5.** DMPO- $\cdot\text{O}_2^-$  spin-trapping ESR spectra of  $\alpha\text{-Fe}_2\text{O}_3/\text{CQD}@g\text{-C}_3\text{N}_4$  and  $\text{CQD}@g\text{-C}_3\text{N}_4$  in the photo-degradation of methanol before and after 5 min visible light illumination.



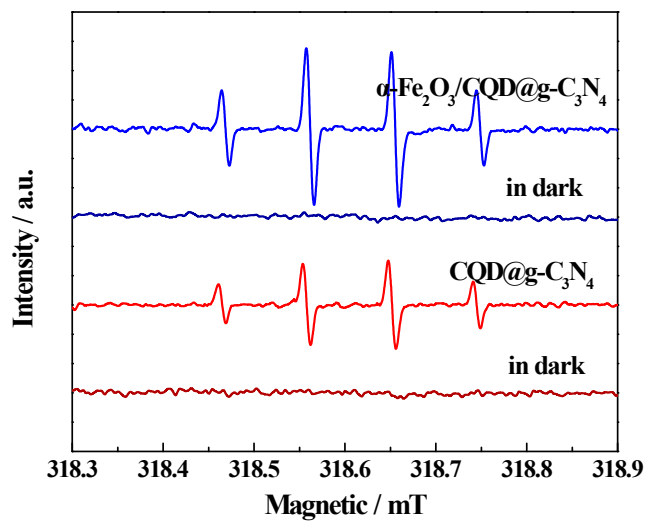

**Fig. S6.** DMPO-·OH spin-trapping ESR spectra of  $\text{CQD}@g\text{-C}_3\text{N}_4$  and  $\alpha\text{-Fe}_2\text{O}_3/\text{CQD}@g\text{-C}_3\text{N}_4$  in water before and after 10 min illumination.

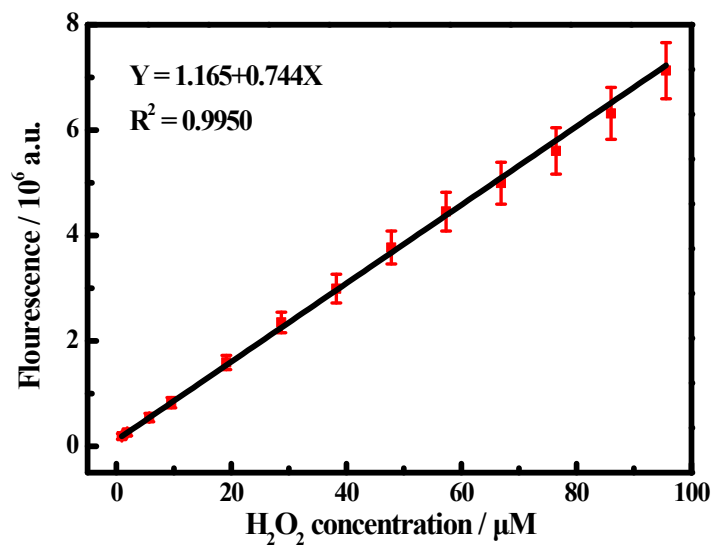

**Fig. S7.** The calibration curve of fluorescence intensities versus different H<sub>2</sub>O<sub>2</sub> concentrations.

**Table S1.** Element content analysis of  $\alpha$ -Fe<sub>2</sub>O<sub>3</sub>/CQD@g-C<sub>3</sub>N<sub>4</sub> composite from XPS spectra

(Atomic %)

| Sample                                                                        | C/%   | N/%   | Fe/% | O/%  |
|-------------------------------------------------------------------------------|-------|-------|------|------|
| $\alpha$ -Fe <sub>2</sub> O <sub>3</sub> /CQD/g-C <sub>3</sub> N <sub>4</sub> | 50.18 | 40.24 | 2.82 | 6.76 |

**Table S2.** Energy band gaps, conduction band potentials, and valence band potentials of ultrathing-C<sub>3</sub>N<sub>4</sub> and (110) exposed  $\alpha$ -Fe<sub>2</sub>O<sub>3</sub>.

| Samples                                                | E <sub>g</sub> /eV | E <sub>CB</sub> /eV | E <sub>VB</sub> /eV |
|--------------------------------------------------------|--------------------|---------------------|---------------------|
| ultrathin g-C <sub>3</sub> N <sub>4</sub>              | 2.81               | -1.13               | 1.68                |
| (110) exposed $\alpha$ -Fe <sub>2</sub> O <sub>3</sub> | 2.17               | 0.26                | 2.43                |

**Table S3.** Comparison of photocatalytic performances for H<sub>2</sub>O<sub>2</sub> production among different photocatalysts.

| Photocatalyst                                                         | Cocatalyst | Sacrificial agent               | Gas atmosphere (air)     | Materials input (mg) | H <sub>2</sub> O <sub>2</sub> yield rate (μmol·g <sup>-1</sup> ·h <sup>-1</sup> ) | Ref.             |
|-----------------------------------------------------------------------|------------|---------------------------------|--------------------------|----------------------|-----------------------------------------------------------------------------------|------------------|
| g-C <sub>3</sub> N <sub>4</sub> /PWO                                  | /          | /                               | /                        | 100                  | 29                                                                                | [1]              |
| Cv/g-C <sub>3</sub> N <sub>4</sub>                                    | /          | /                               | /                        | 100                  | ca. 92                                                                            | [2]              |
| g-C <sub>3</sub> N <sub>4</sub> /CoWO                                 | /          | /                               | /                        | 100                  | 187                                                                               | [3]              |
| Cu <sub>2</sub> (OH)PO <sub>4</sub> /g-C <sub>3</sub> N <sub>4</sub>  | /          | /                               | saturated O <sub>2</sub> | 200                  | 400                                                                               | [4]              |
| mesoporous g-C <sub>3</sub> N <sub>4</sub>                            | /          | C <sub>2</sub> H <sub>6</sub> O | saturated O <sub>2</sub> | 20                   | ca. 187.5                                                                         | [5]              |
| SN-GQD/TiO <sub>2</sub>                                               | /          | C <sub>3</sub> H <sub>8</sub> O | saturated O <sub>2</sub> | 25                   | 110.4                                                                             | [6]              |
| rGO/Cd <sub>3</sub> (TMT) <sub>2</sub>                                | /          | CH <sub>3</sub> OH              | /                        | 80                   | 95                                                                                | [7]              |
| g-C <sub>3</sub> N <sub>4</sub> /CNTs                                 | /          | HCOOH                           | /                        | 100                  | 326                                                                               | [8]              |
| APTMS/TiO <sub>2</sub>                                                | Pd         | phosphate                       | /                        | 5                    | 300                                                                               | [9]              |
| TiO <sub>2</sub>                                                      | Au/Ag      | C <sub>2</sub> H <sub>6</sub> O | saturated O <sub>2</sub> | 5                    | 150                                                                               | [10]             |
| <b>α-Fe<sub>2</sub>O<sub>3</sub>/CQD@g-C<sub>3</sub>N<sub>4</sub></b> | /          | /                               | saturated O <sub>2</sub> | <b>5</b>             | <b>138.6</b>                                                                      | <b>This work</b> |

## References

- [1] S. Zhao and X. Zhao, Polyoxometalates-derived metal oxides incorporated into graphitic carbon nitride framework for photocatalytic hydrogen peroxide production under visible light, *J. Catal.*, 2018, **366**, 98-106.
- [2] S. Li, *et al.* Effective photocatalytic H<sub>2</sub>O<sub>2</sub> production under visible light irradiation at g-C<sub>3</sub>N<sub>4</sub> modulated by carbon vacancies, *Appl. Catal. B-Environ.*, 2016, **190**, 26-35.
- [3] S. Zhao and X. Zhao, Insights into the role of singlet oxygen in the photocatalytic hydrogen peroxide production over polyoxometalates-derived metal oxides incorporated into graphitic carbon nitride framework, *Appl. Catal. B-Environ.*, 2019, **250**, 408-418.
- [4] X. Wang, Z. Han, L. Yu, C. Liu, Y. Liu and G. Wu, Synthesis of full-spectrum-response Cu<sub>2</sub>(OH)PO<sub>4</sub>/g-C<sub>3</sub>N<sub>4</sub> photocatalyst with outstanding photocatalytic H<sub>2</sub>O<sub>2</sub> production performance via a “Two Channel Route”, *ACS Sustain. Chem. Eng.*, 2018, **6**, 14542-14553.

- [5] Y. Shiraishi, Y. Kofuji, H. Sakamoto, S. Tanaka, S. Ichikawa and T. Hirai, Effects of surface defects on photocatalytic H<sub>2</sub>O<sub>2</sub> production by mesoporous graphitic carbon nitride under visible light irradiation, *ACS Catal.*, 2015, **5**, 3058-3066.
- [6] L. Zheng, *et al.* Highly selective photocatalytic production of H<sub>2</sub>O<sub>2</sub> on sulfur and nitrogen co-doped graphene quantum dots tuned TiO<sub>2</sub>, *Appl. Catal. B-Environ.*, 2018, **239**, 475-484.
- [7] J. Xu, *et al.* Cd<sub>3</sub>(C<sub>3</sub>N<sub>3</sub>S<sub>3</sub>)<sub>2</sub> coordination polymer/graphene nanoarchitectures for enhanced photocatalytic H<sub>2</sub>O<sub>2</sub> production under visible light, *Sci. Bull.*, 2017, **62**, 610-618.
- [8] S. Zhao, T. Guo, X. Li, T. Xue, B. Yang and X. Zhao, Carbon nanotubes covalent combined with graphitic carbon nitride for photocatalytic hydrogen peroxide production under visible light, *Appl. Catal. B-Environ.*, 2018, **224**, 725-732.
- [9] C. Chu, *et al.* Electronic tuning of metal nanoparticles for highly efficient photocatalytic hydrogen peroxide production, *ACS Catal.*, 2019, **9**, 626-631.
- [10] D. Tsukamoto, *et al.* Photocatalytic H<sub>2</sub>O<sub>2</sub> production from ethanol/O<sub>2</sub> system using TiO<sub>2</sub> loaded with Au-Ag bimetallic alloy nanoparticles, *ACS Catal.*, 2012, **2**, 599-603.
